# Supplementary material for: One-step synthesis of the nickel foam supported network-like ZnO nanoarchitectures assembled with ultrathin mesoporous nanosheets with improved lithium storage performance
Source: Royal Society of Chemistry journal article supplement (doi:10.1039/c5ra13560e), 2015-01-01
Supplement: c5ra13560e1.pdf [file c5ra13560e1.pdf]

Electronic Supplementary Material (ESI) for RSC Advances.

This journal is © The Royal Society of Chemistry 2015

## Supporting Information

One-step synthesis of the nickel foam supported network-like  
ZnO nanoarchitectures assembled with ultrathin mesoporous  
nanosheets with improved lithium storage performance

Xiaoyu Wu, Songmei Li,\* Bo Wang, Jianhua Liu, Mei Yu

*Key Laboratory of Aerospace Advanced Materials and Performance of Ministry of  
Education, School of Materials Science and Engineering, Beihang University, Beijing,  
100191, P. R. China*

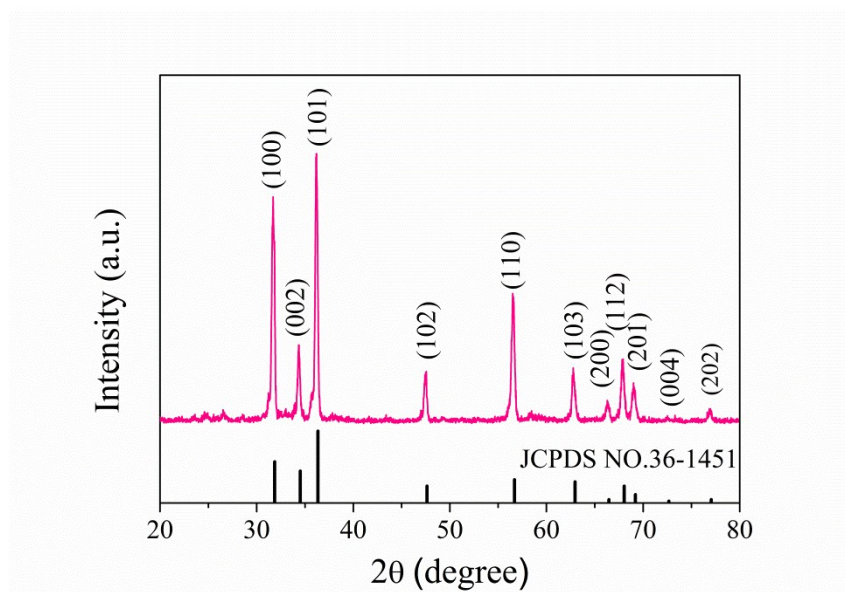

Fig. S1 XRD pattern of the ZnO powders and the standard XRD pattern of hexagonal

\* Corresponding author. Tel: +86 10 82317103; fax: +86 10 82317103.  
E-mail address: songmei\_li@buaa.edu.cn.

ZnO.

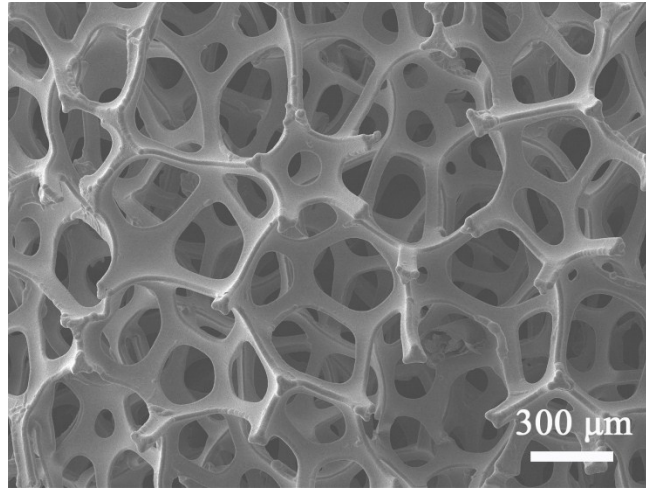

Fig. S2 Typical SEM image of the nickel foam.

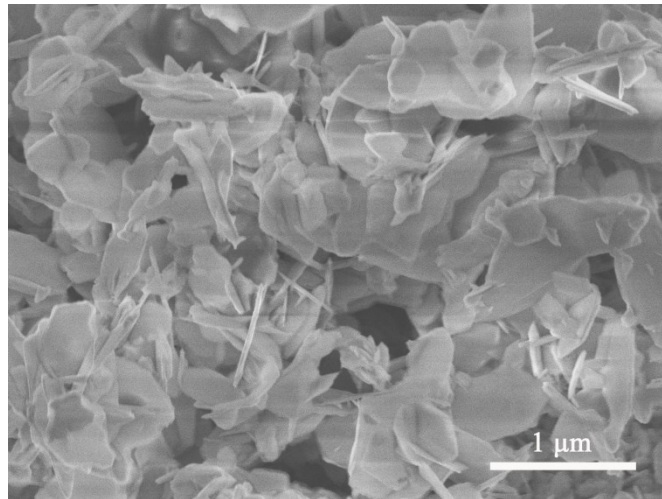

Fig. S3 Typical SEM images of the ZnO powders.

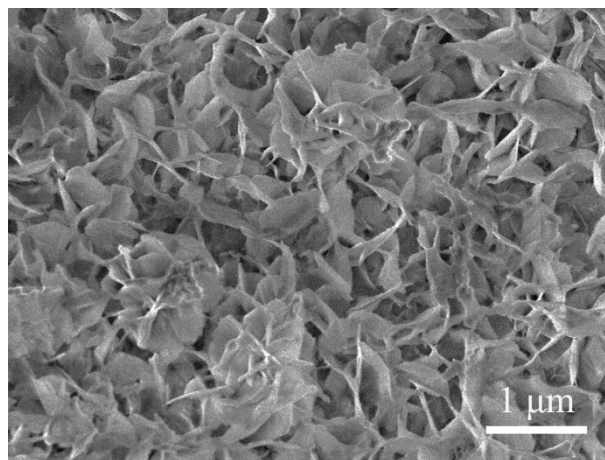

Fig. S4 SEM images of the ZnO@NF electrode after 100 cycles.
